# Supplementary material
Source: PubMed Central journal article supplement (PMC6645213)
Supplement: ao8b01149_si_001.pdf [file ao8b01149_si_001.pdf]

## Supporting Information

### Stable Platinum(IV) Corroles: Synthesis, Molecular Structure, and Room-Temperature Near-IR Phosphorescence

Abraham B. Alemayehu,<sup>a</sup> Laura J. McCormick,<sup>b</sup> Kevin J. Gagnon,<sup>b</sup> Sergey M. Borisov<sup>c</sup> and  
Abhik Ghosh<sup>\*,a</sup>

<sup>a</sup>Department of Chemistry, UiT – The Arctic University of Norway, N-9037 Tromsø, Norway;  
Email: abhik.ghosh@uit.no

<sup>b</sup>Advanced Light Source, Lawrence Berkeley National Laboratory,  
Berkeley, CA 94720-8229, USA

<sup>c</sup>Institute of Analytical Chemistry and Food Chemistry, NAWI Graz, Graz University of  
Technology, Stremayrgasse 9, 8010 Graz, Austria

## Electrospray ionization mass spectra

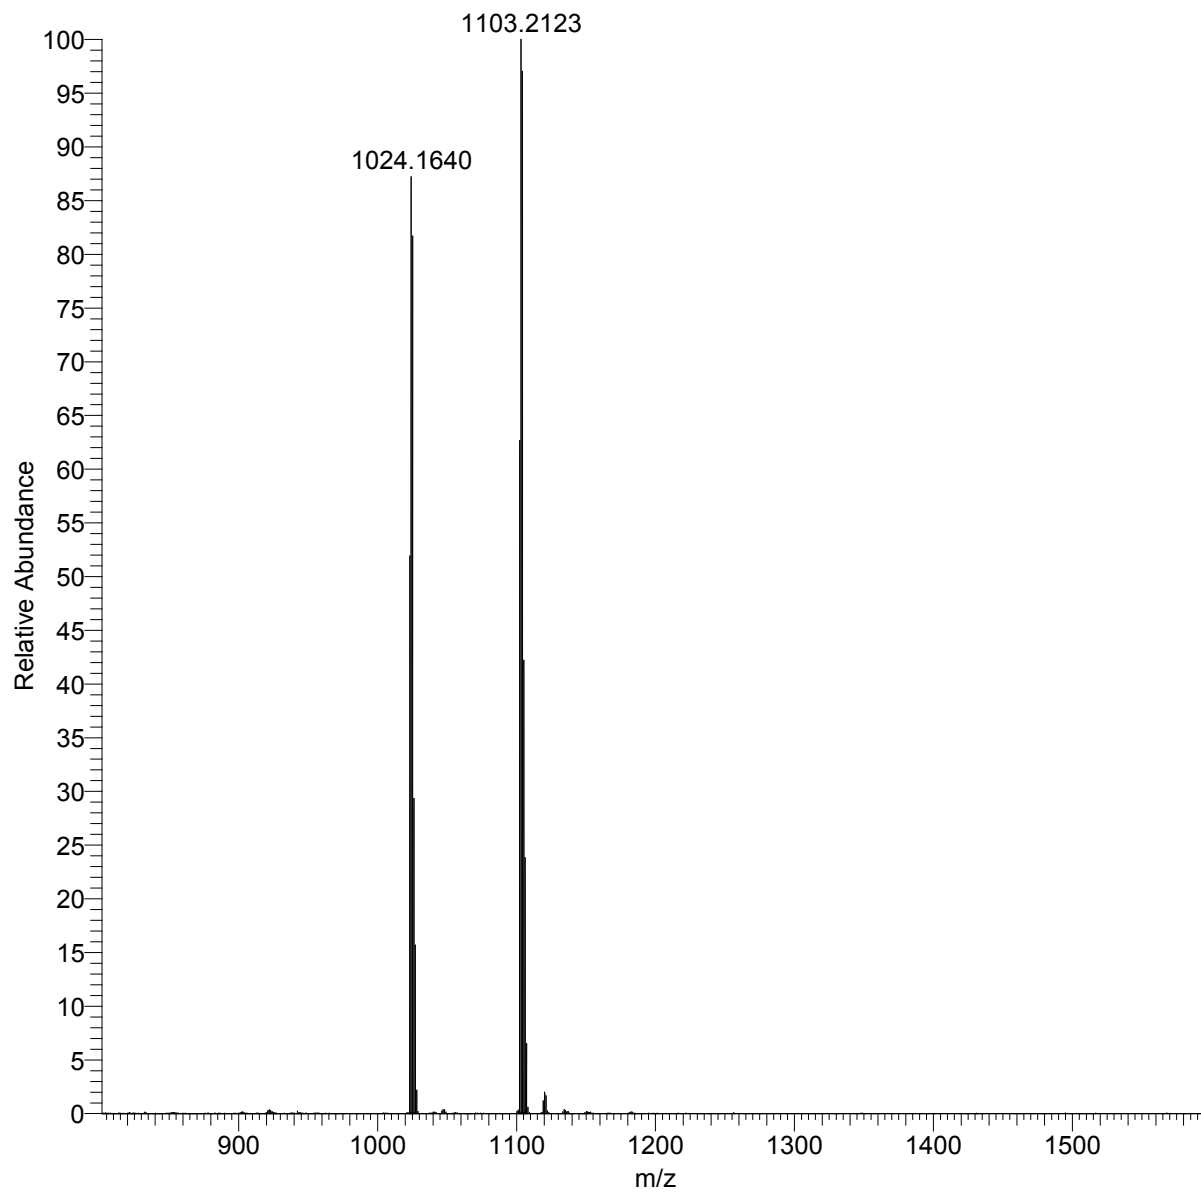

**Figure S1.** Positive-mode ESI MS of Pt[TpCF<sub>3</sub>PC](*m*-C<sub>6</sub>H<sub>4</sub>CN)(py).

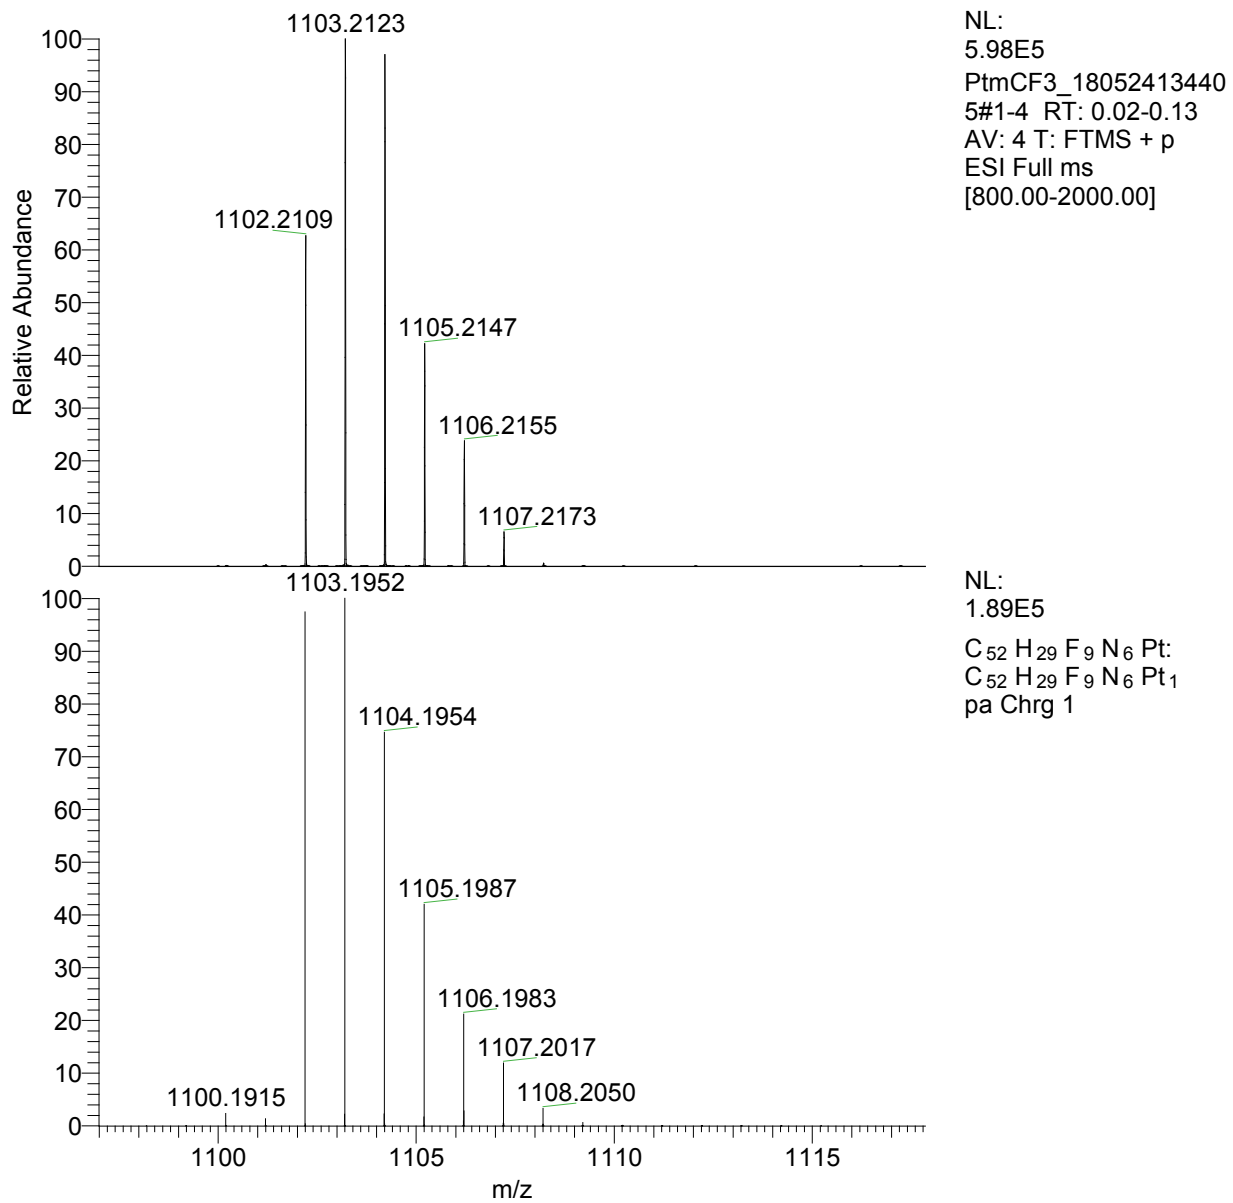

**Figure S2.** Close-up of positive-mode ESI MS of  $\text{Pt}[\text{TpCF}_3\text{PC}](m\text{-C}_6\text{H}_4\text{CN})(\text{py})$ : experimental (above) and simulation (below).

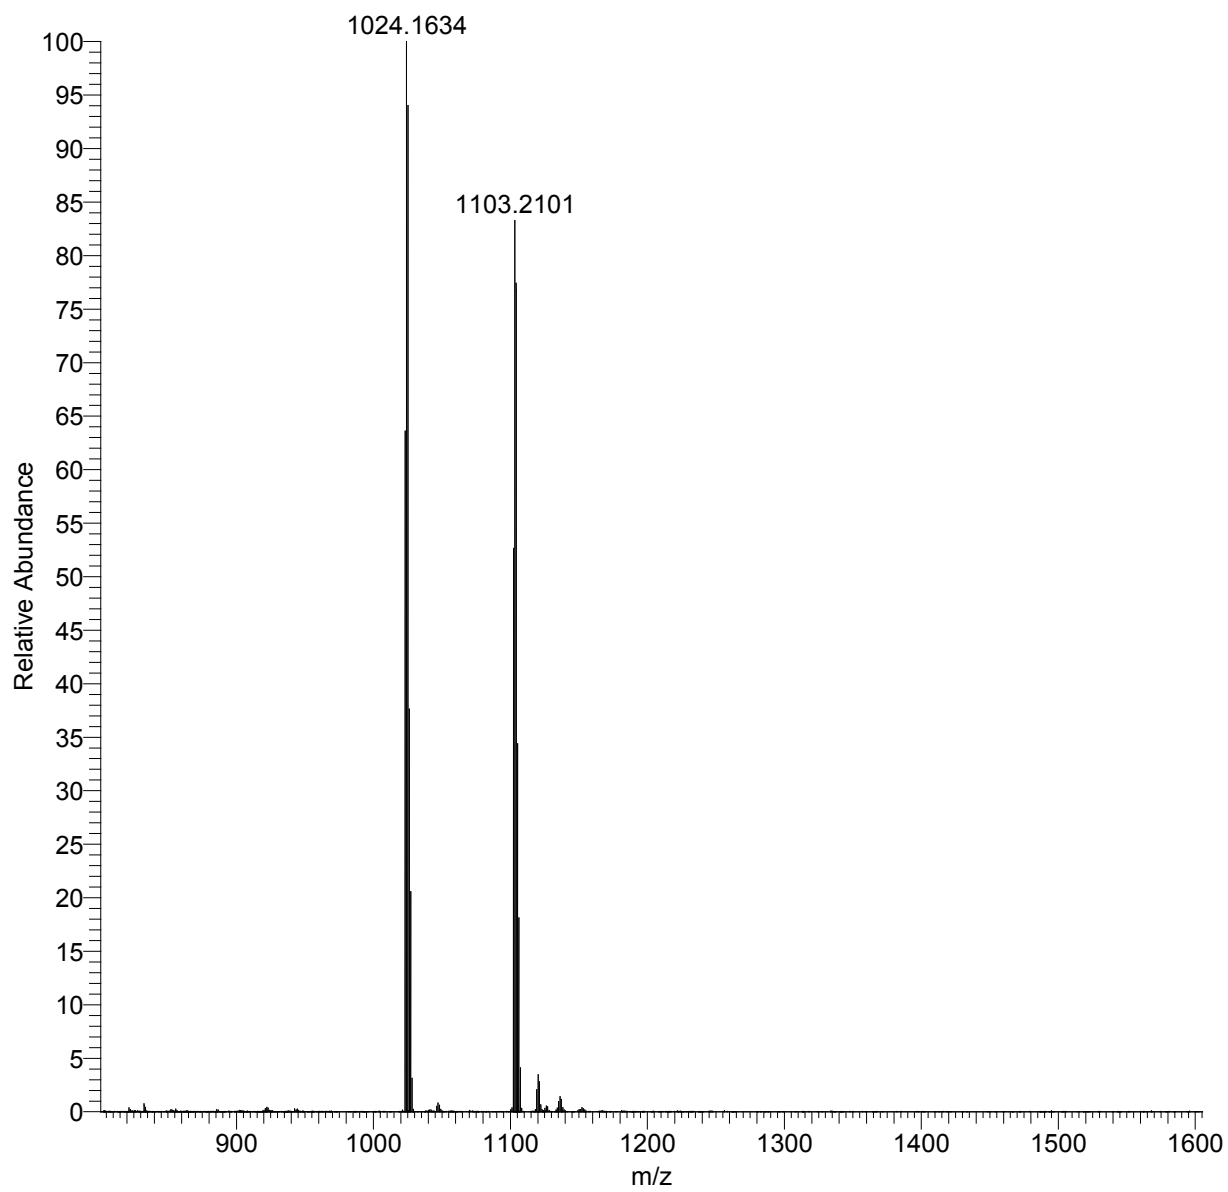

**Figure S3.** Positive-mode ESI MS of Pt[*Tp*CF<sub>3</sub>PC](*p*-C<sub>6</sub>H<sub>4</sub>CN)(py).

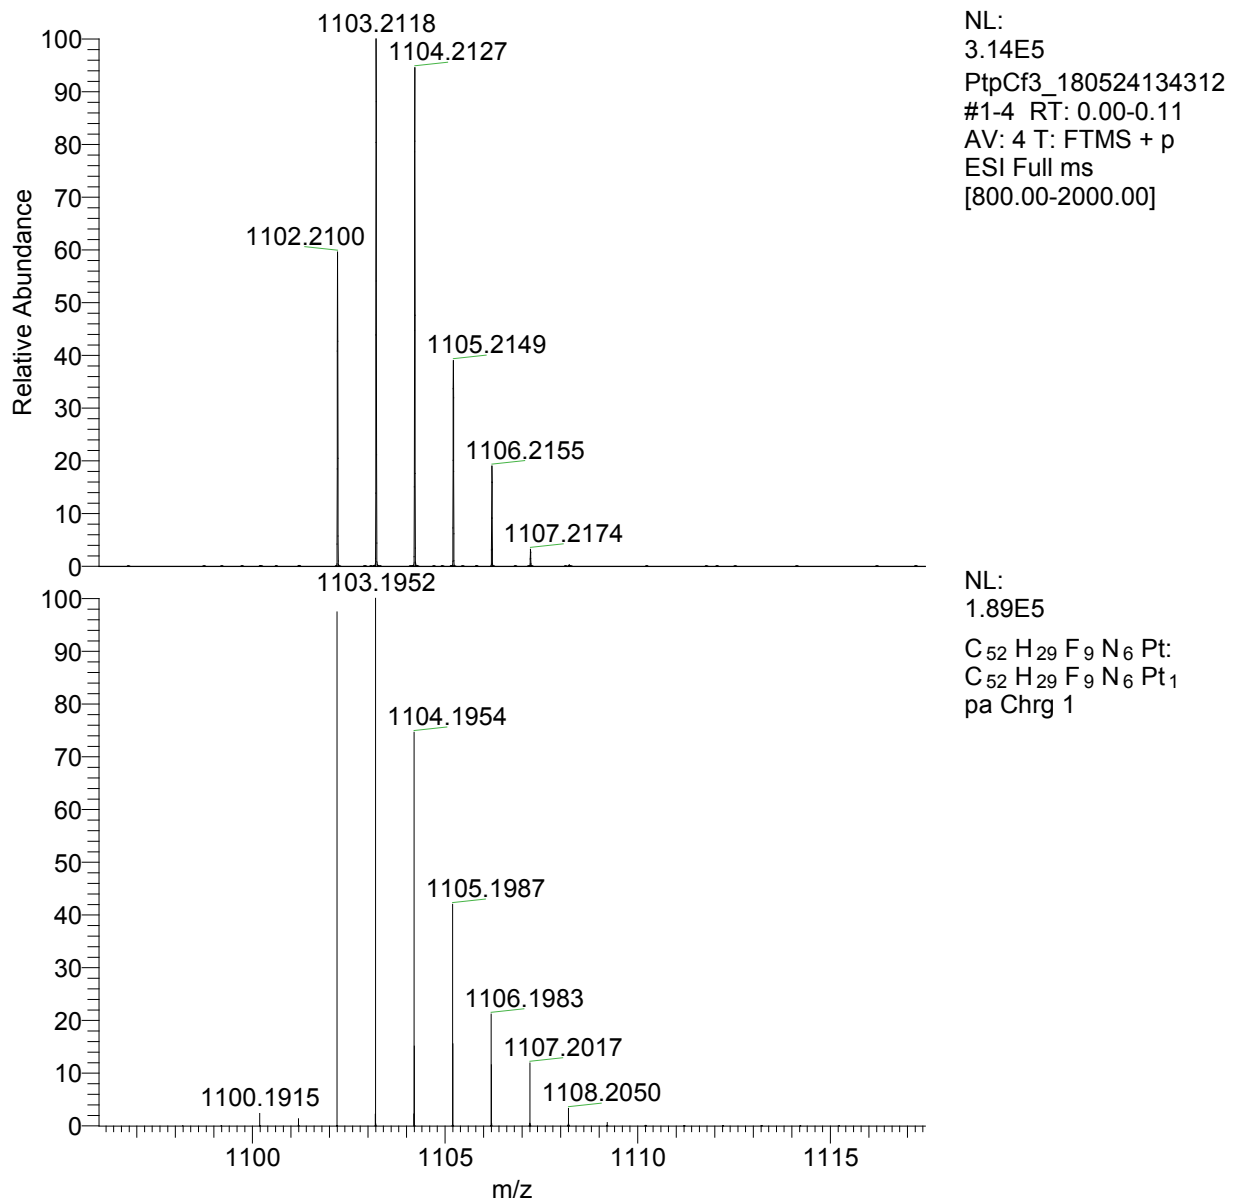

**Figure S4.** Close-up of positive-mode ESI MS of Pt[*Tp*CF<sub>3</sub>PC](*p*-C<sub>6</sub>H<sub>4</sub>CN)(py): experimental (above) and simulation (below).

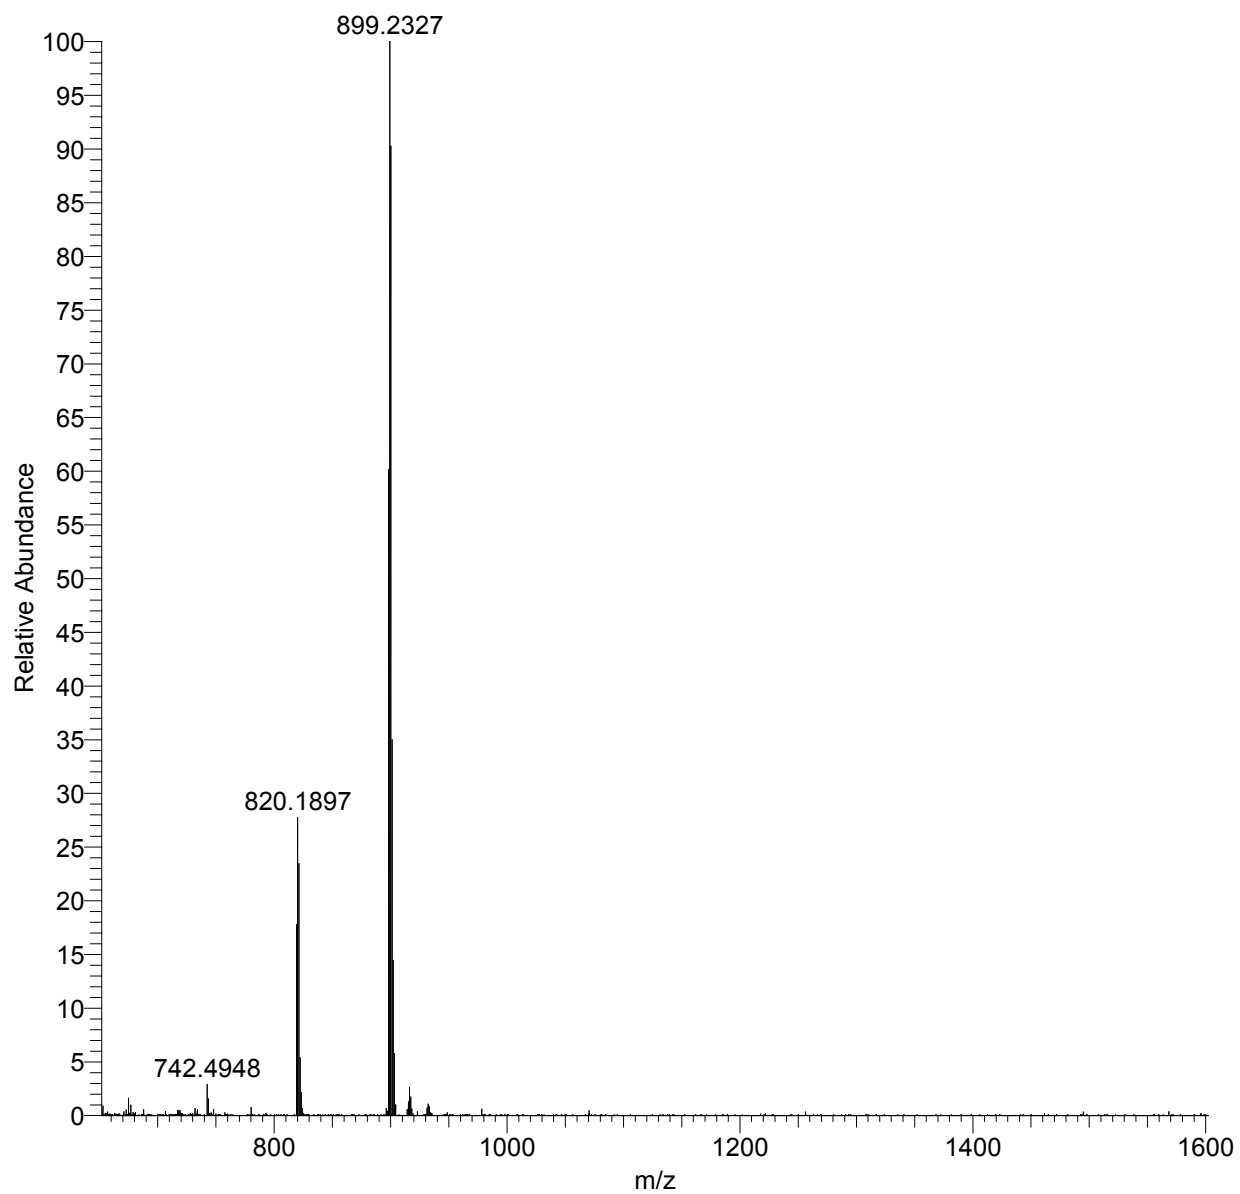

**Figure S5.** Positive-mode ESI MS of Pt[TPC](*m*-C<sub>6</sub>H<sub>4</sub>CN)(py).

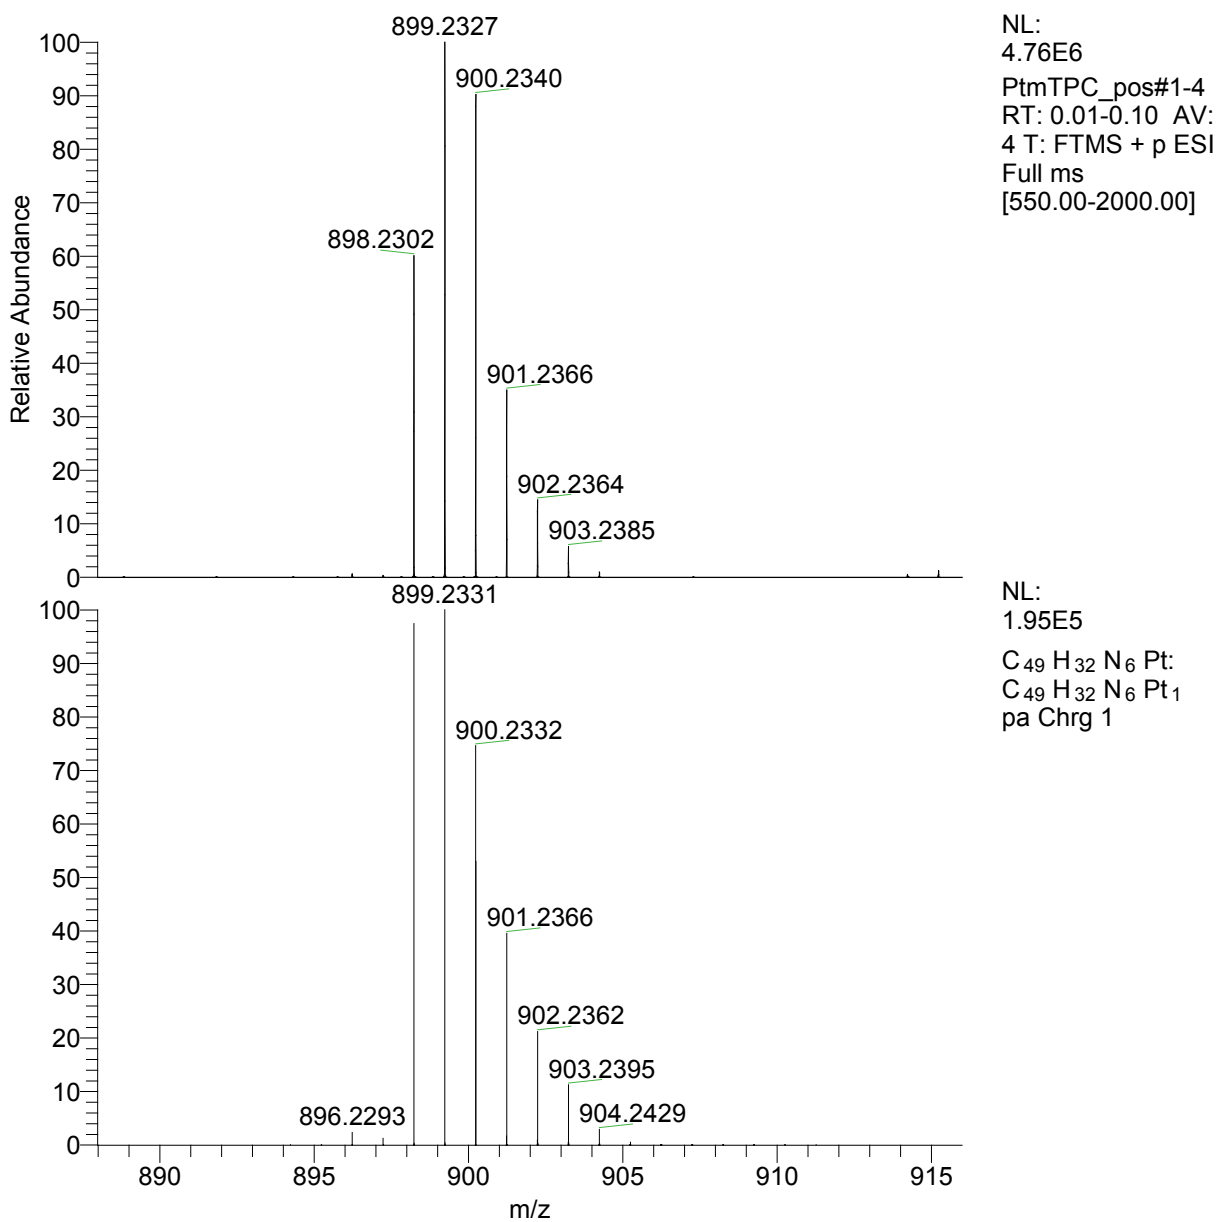

**Figure S6.** Close-up of positive-mode ESI MS of Pt[TPC](*m*-C<sub>6</sub>H<sub>4</sub>CN)(py): experimental (above) and simulation (below).

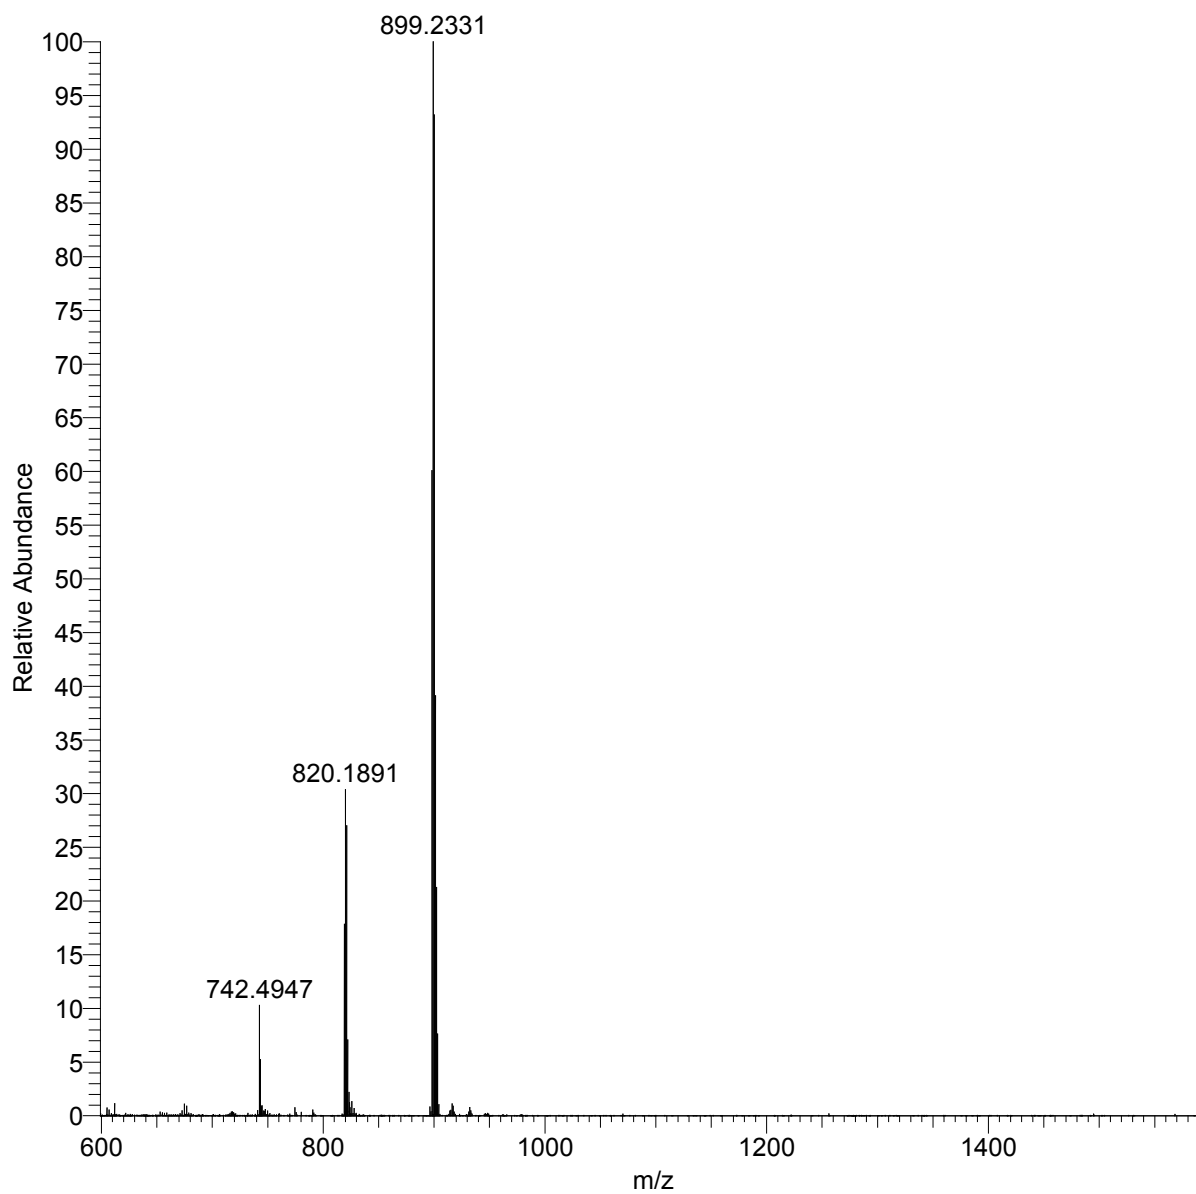

**Figure S7.** Positive-mode ESI MS of Pt[TPC](*p*-C<sub>6</sub>H<sub>4</sub>CN)(py).



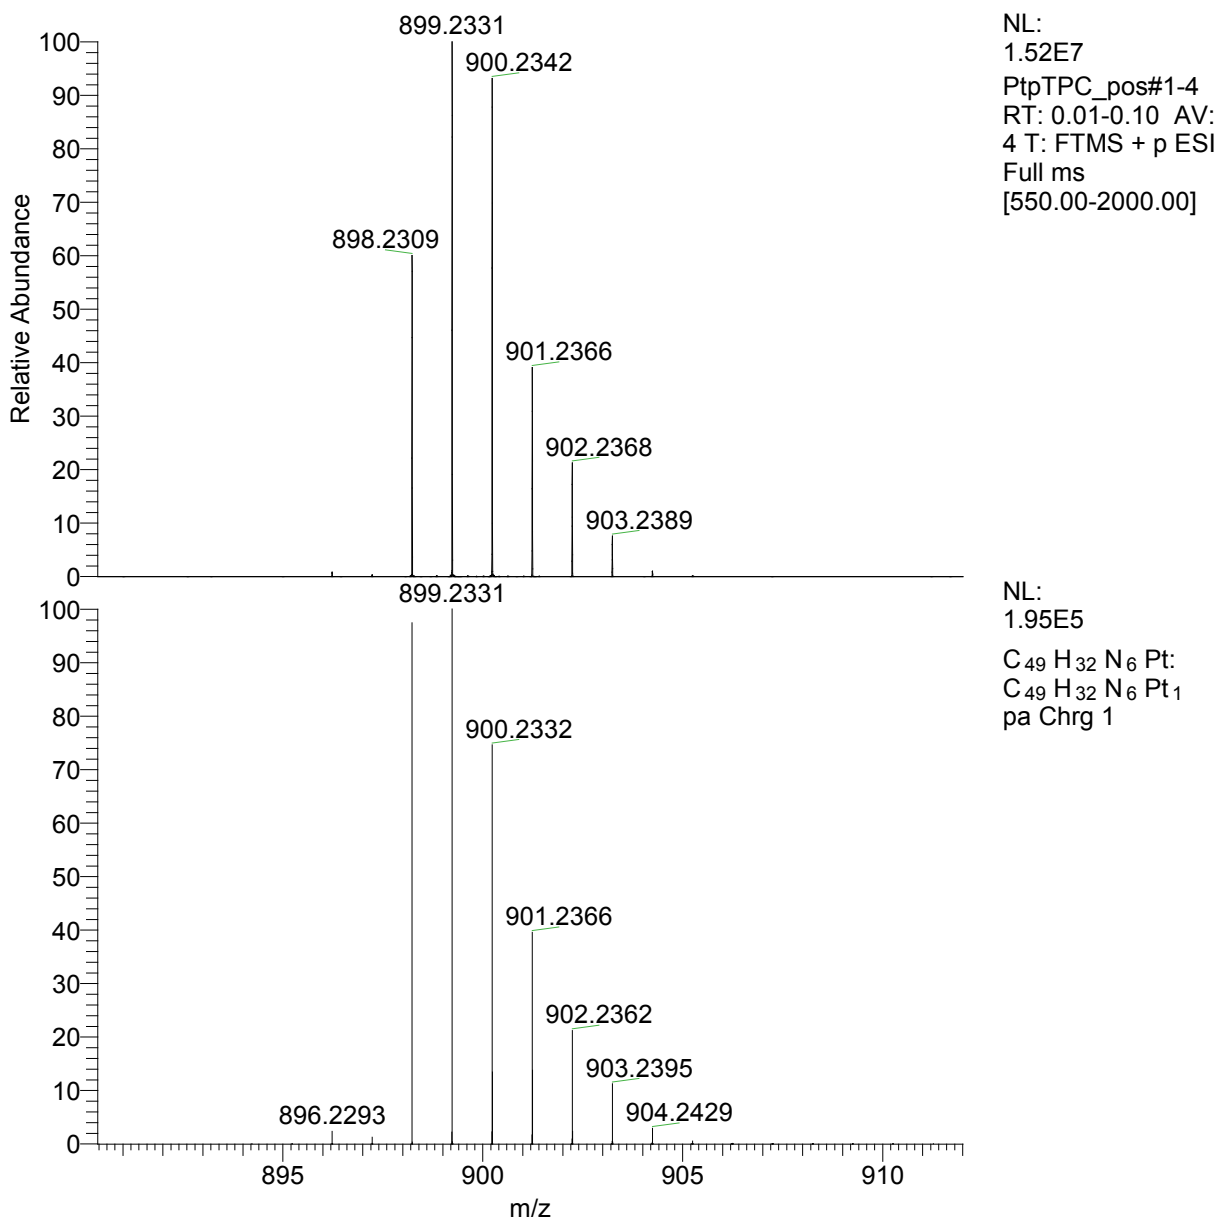

**Figure S8.** Close-up of positive-mode ESI MS of Pt[TPC](*p*-C<sub>6</sub>H<sub>4</sub>CN)(py): experimental (above) and simulation (below).

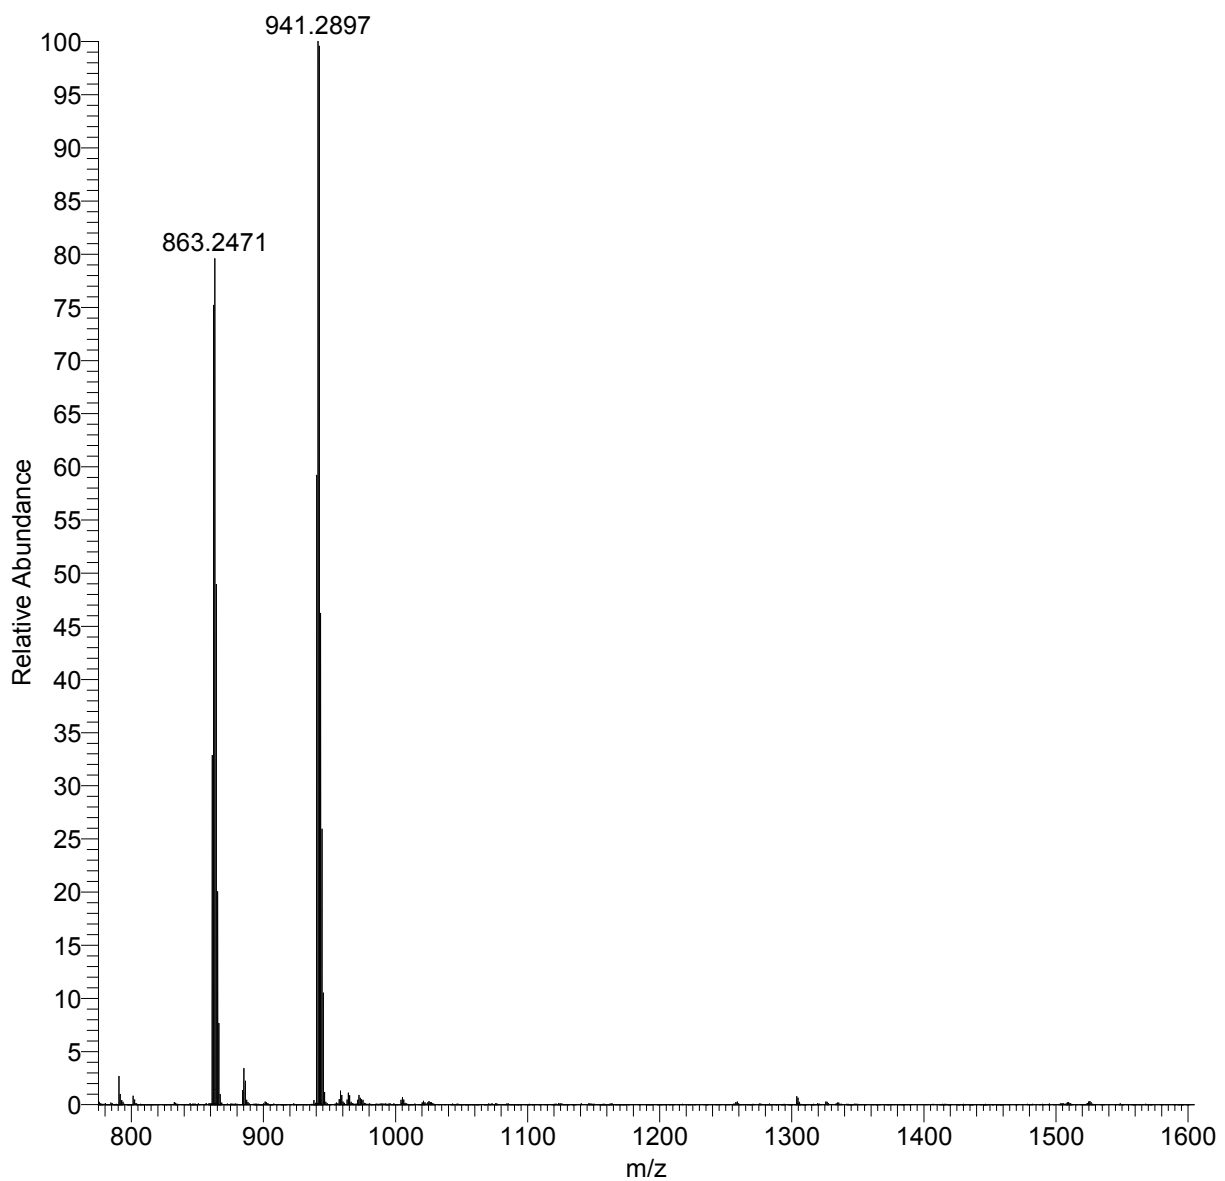

**Figure S9.** Positive-mode ESI MS of Pt[TpCH<sub>3</sub>PC](*m*-C<sub>6</sub>H<sub>4</sub>CN)(py).

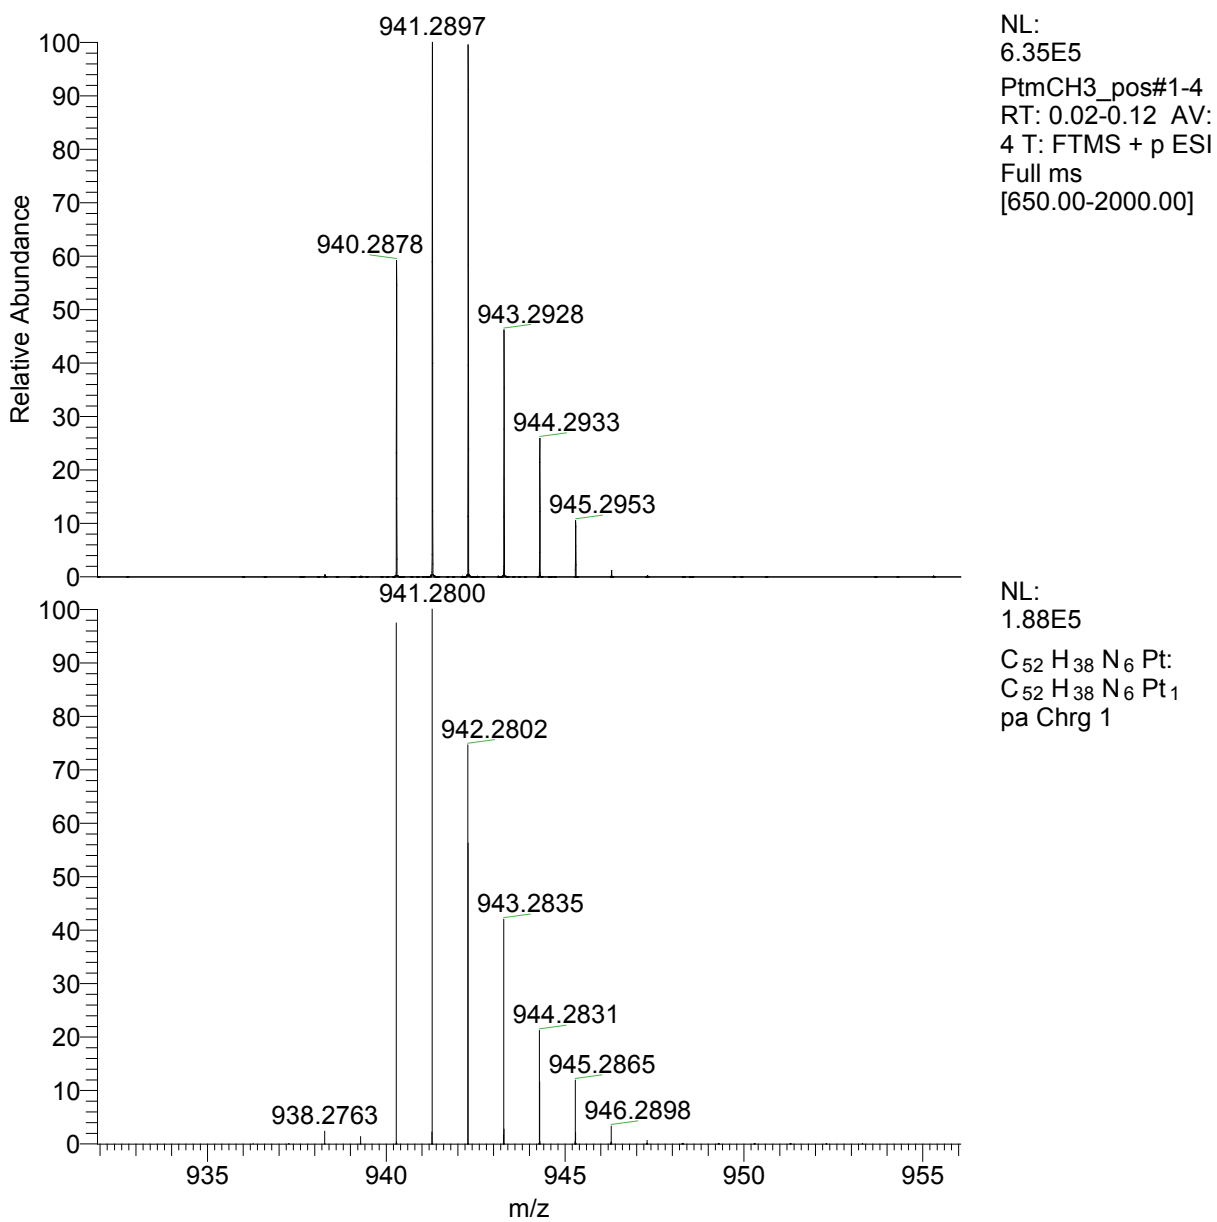

**Figure S10.** Close-up of positive-mode ESI MS of Pt[*TP*CH<sub>3</sub>PC](*m*-C<sub>6</sub>H<sub>4</sub>CN)(py): experimental (above) and simulation (below).

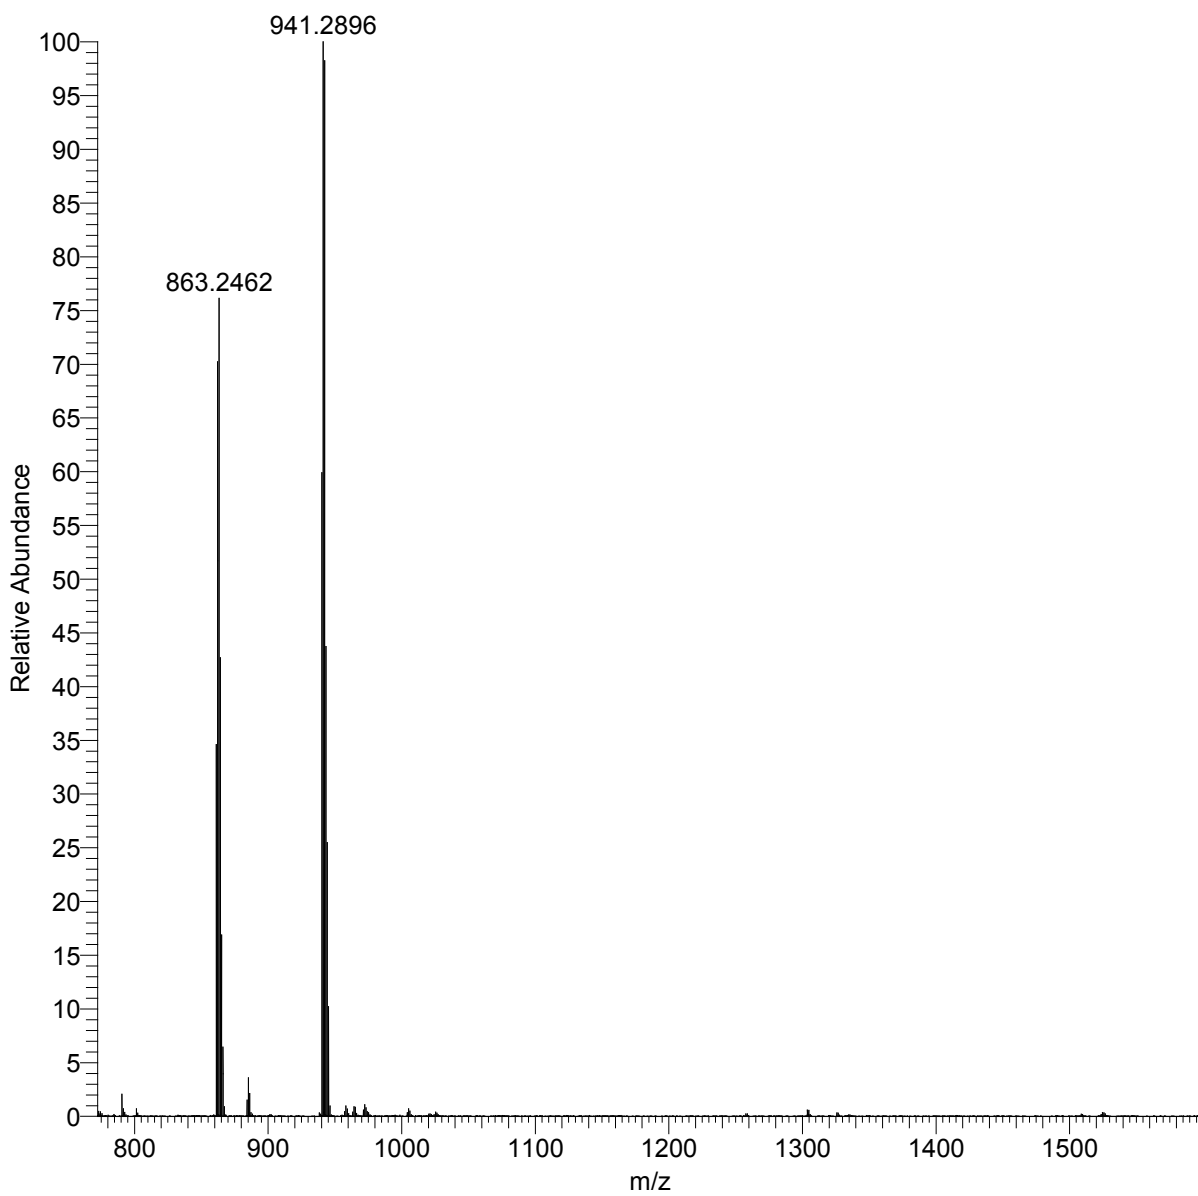

**Figure S11.** Positive-mode ESI MS of Pt[T(*p*CH<sub>3</sub>PC)](*p*-C<sub>6</sub>H<sub>4</sub>CN)(py).

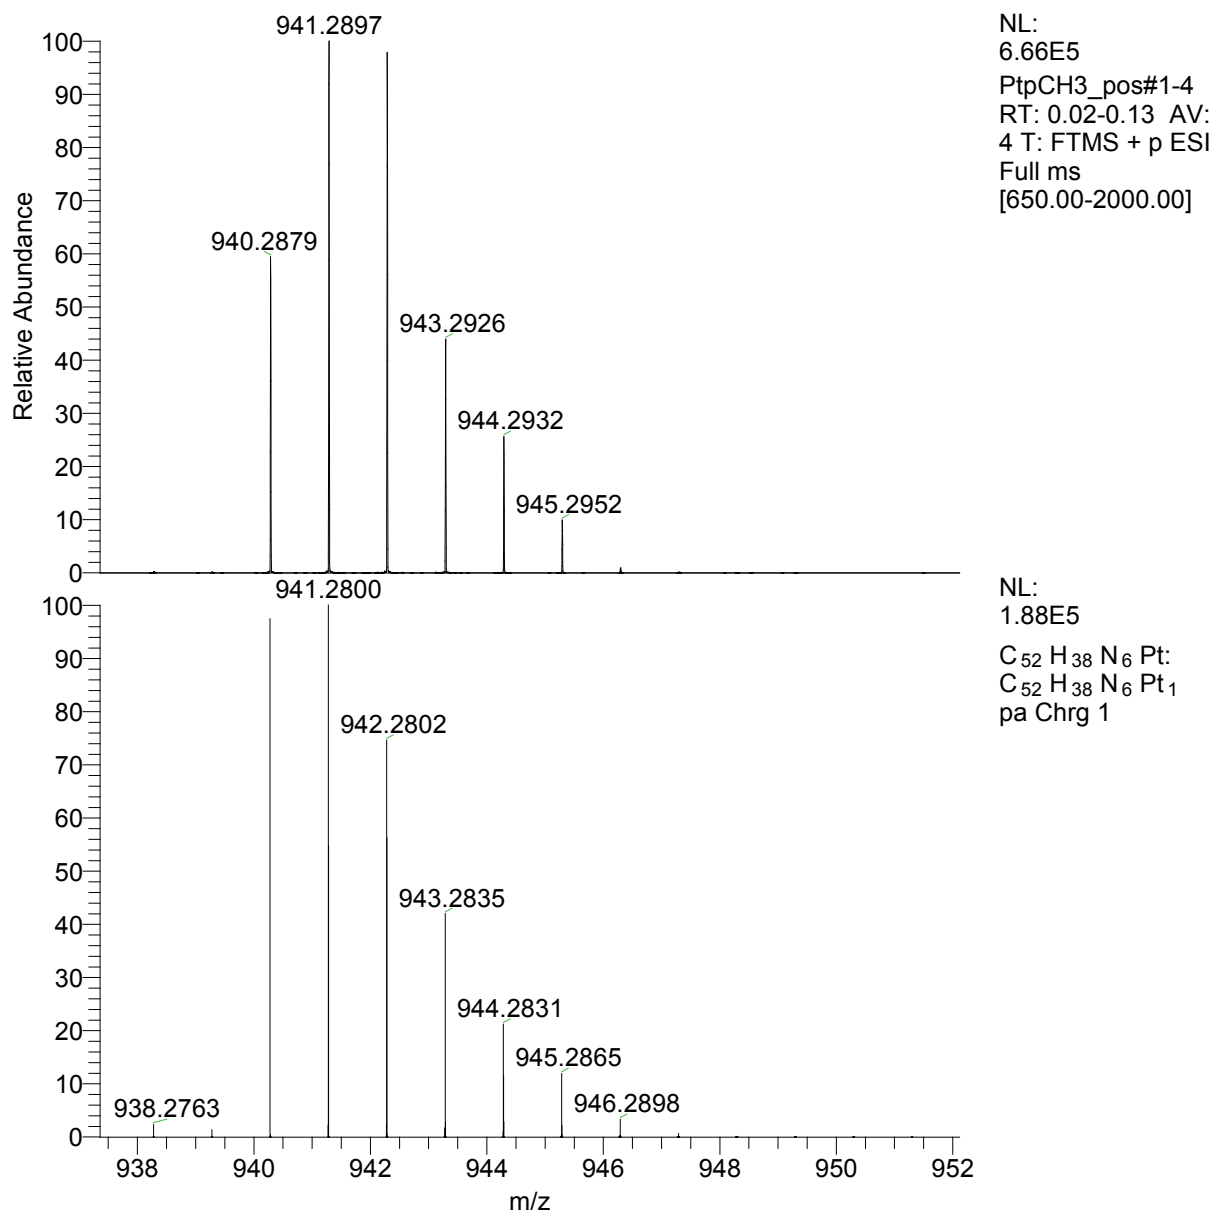

**Figure S12.** Close-up of positive-mode ESI MS of  $\text{Pt}[\text{T}(p\text{CH}_3\text{PC})](p\text{-C}_6\text{H}_4\text{CN})(\text{py})$ : experimental (above) and simulation (below).
